# Supplementary material
Source: bioRxiv or medRxiv preprint supplement (https://www.medrxiv.org/highwire/filestream/92855/field_highwire_adjunct_files/0/2020.08.06.20169573-1.pdf)
Supplement: Supplementary file [file 2020.08.06.20169573-1.pdf]

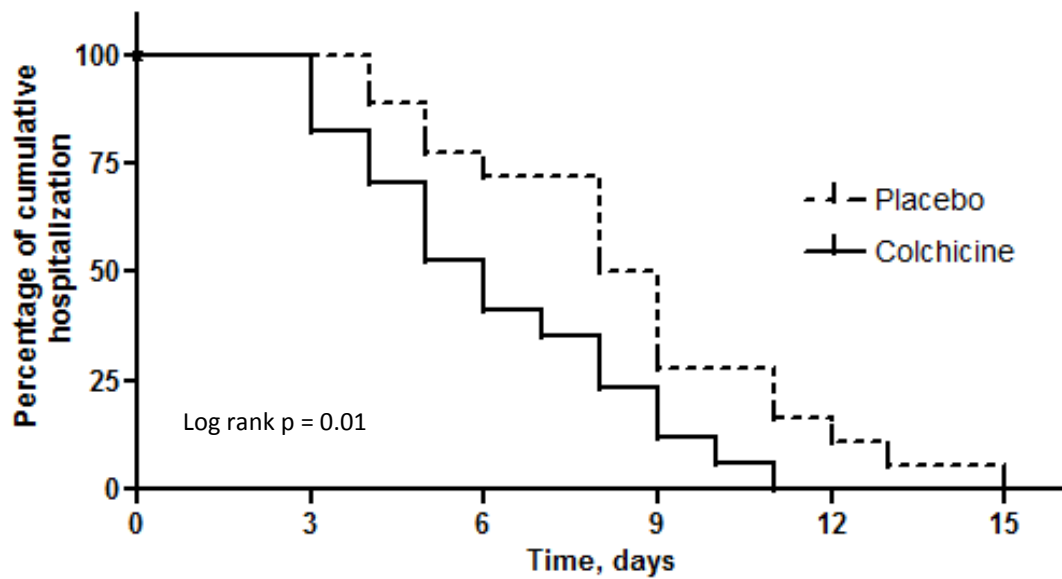

|                |    |    |    |   |   |
|----------------|----|----|----|---|---|
| Placebo (n)    | 18 | 18 | 13 | 5 | 2 |
| Colchicine (n) | 17 | 14 | 7  | 2 | 0 |

**Supplementary Figure 1.** Kaplan-Meier curves of time to clinical improvement and discharge for both groups
